# Supplementary material for: Inverse sex-based expression profiles of PTEN and Klotho in mice
Source: PubMed Central journal article supplement (PMC7677532; doi:10.1038/s41598-020-77217-5), 2020-11-19
Supplement: 41598_2020_77217_MOESM1_ESM.pdf [file 41598_2020_77217_MOESM1_ESM.pdf]

## Inverse sex-based expression profiles of PTEN and Klotho in mice

Natalia Prudente de Mello<sup>1</sup>, Diana Zukas Andreotti<sup>1,2</sup>, Ana Maria Orellana<sup>2</sup>, Cristoforo Scavone<sup>2</sup>, Elisa Mitiko Kawamoto<sup>1</sup>

<sup>1</sup>Laboratory of Molecular and Functional Neurobiology, Department of Pharmacology, Institute of Biomedical Sciences, University of São Paulo, Brazil.

<sup>2</sup>Laboratory of Molecular Neuropharmacology, Department of Pharmacology, Institute of Biomedical Sciences, University of São Paulo, Brazil.

Correspondence and requests for materials should be addressed to E.M.K (email: [kawamotoe@gmail.com](mailto:kawamotoe@gmail.com))

### SUPPLEMENTARY MATERIAL

#### Supplementary Figures

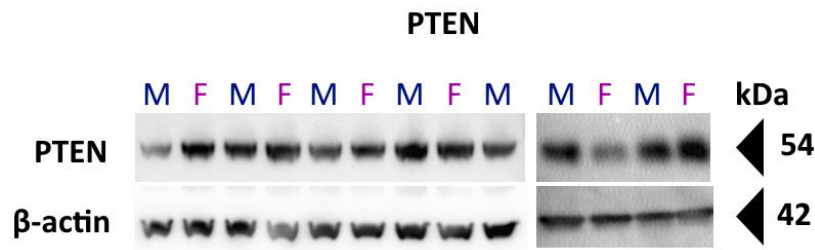

**Supplementary Figure S1.** Western blotting membrane images of cortical PTEN protein [n = 7 (male) and n = 6 (female)]. Approximate position of the molecular weight standard is indicated by the black arrowhead. Full membrane blots are provided in Supplementary Information Figure 1.

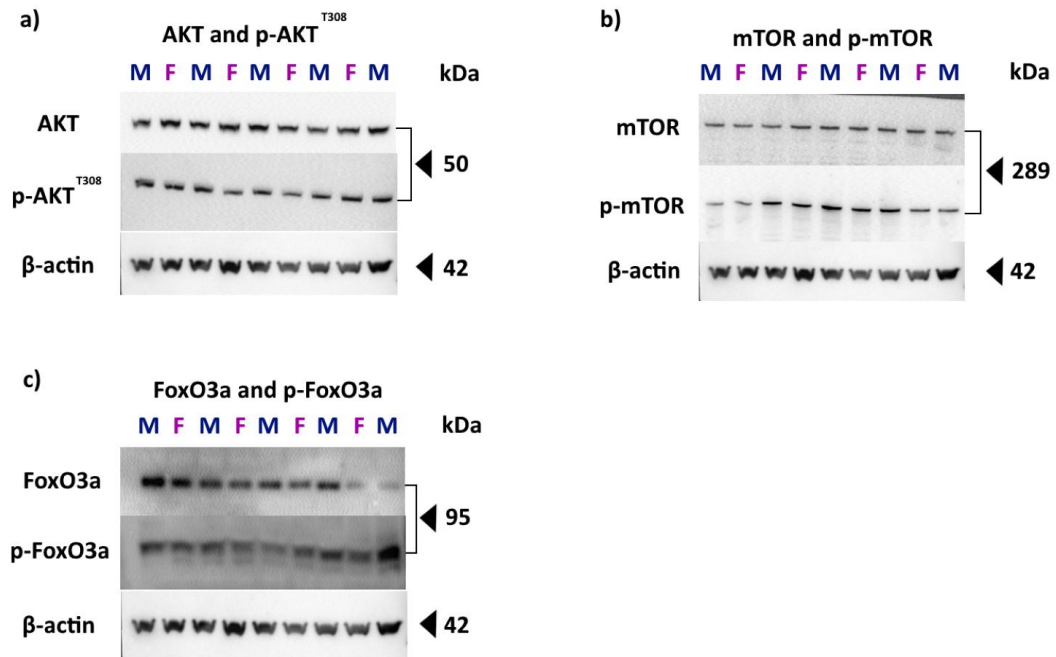

**Supplementary Figure S2.** Western blotting membrane images of AKT, mTOR and FoxO3a. **(a)** AKT and p-AKT<sup>T308</sup> [n = 5 (male) and n = 4 (female); ns]; **(b)** mTOR and p-mTOR [n = 5 (male) and n = 4 (female); *P* = 0.0011]; **(c)** FoxO3a and p-FoxO3a [n = 5 (male) and n = 4 (female); *P* = 0.0020]. Approximate position of the molecular weight standard is indicated by the black arrowhead. Full membrane blots are provided in Supplementary Information Figure 2.

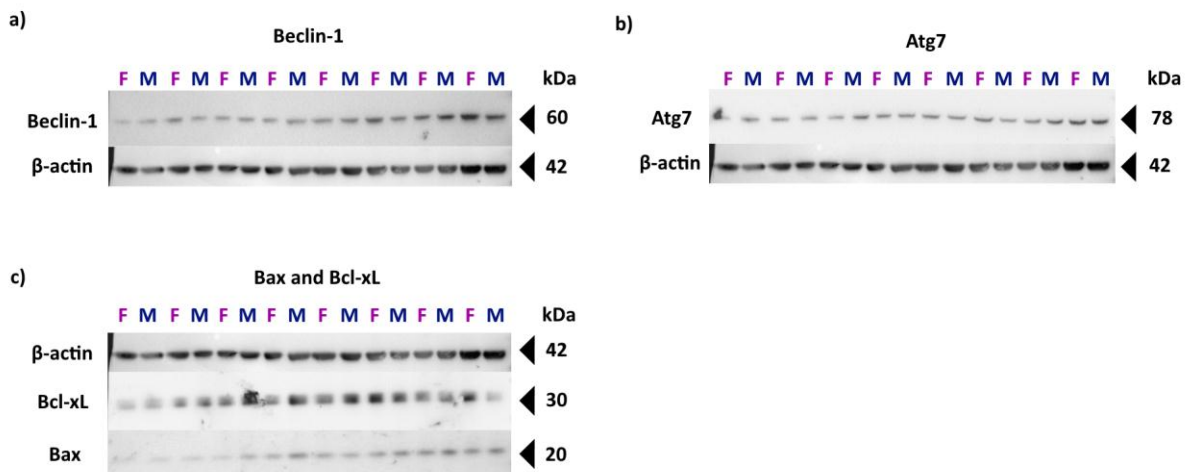

**Supplementary Figure S3.** Western blotting membrane images of Beclin-1, Atg7, Bax and Bcl-xL. **(a)** Beclin-1 [n = 8 (male and female); ns]; **(b)** Atg7 [n = 8 (male and female); ns]; **(c)** Bax and Bcl-xL [n = 7 (male and female); ns]. Approximate position of the molecular weight standard is indicated by the black arrowhead. Full membrane blots are provided in Supplementary Information Figure 3.

## Supplementary Table

| Protein                           | Statistical Analysis | Group compared            | F (DFn, DFd)     | P Value  | Multiple Comparisons correction | Adjusted P Value or q Value | Significant or Discovery |
|-----------------------------------|----------------------|---------------------------|------------------|----------|---------------------------------|-----------------------------|--------------------------|
| <b>PTEN</b>                       | Multiple t test      | F x M                     | -                | 0.033520 | FDR                             | 0.041062                    | Yes                      |
|                                   | Two-way ANOVA        | Interaction               | F(1, 11) = 18.13 | 0.0013   | -                               | -                           | Yes                      |
|                                   |                      | DIV7 x DIV14 (Time Point) | F(1, 11) = 43.73 | <0.0001  | -                               | -                           | Yes                      |
|                                   |                      | F x M (Sex)               | F(1, 11) = 11.71 | 0.0057   | -                               | -                           | Yes                      |
|                                   |                      | DIV7: F x M               | -                | -        | Tukey                           | 0.9251                      | No                       |
|                                   |                      | DIV14: F x M              | -                | -        | Tukey                           | 0.0014                      | Yes                      |
|                                   |                      | F: DIV7 x DIV14           | -                | -        | Tukey                           | <0.0001                     | Yes                      |
| M: DIV7 x DIV14                   | -                    | -                         | Tukey            | 0.4148   | No                              |                             |                          |
| <b>AKT</b>                        | Multiple t tests     | F x M                     | -                | 0.463137 | FDR                             | 0.425507                    | No                       |
| <b>p-AKT<sub>Thr308</sub>/AKT</b> | Multiple t tests     | F x M                     | -                | 0.455328 | FDR                             | 0.425507                    | No                       |
| <b>mTOR</b>                       | Multiple t tests     | F x M                     | -                | 0.026126 | FDR                             | 0.038406                    | Yes                      |
| <b>p-mTOR/mTOR</b>                | Multiple t tests     | F x M                     | -                | 0.001147 | FDR                             | 0.007303                    | Yes                      |
| <b>FoxO3a</b>                     | Multiple t tests     | F x M                     | -                | 0.006478 | FDR                             | 0.015871                    | Yes                      |
| <b>p-FoxO3a/FoxO3a</b>            | Multiple t tests     | F x M                     | -                | 0.001987 | FDR                             | 0.007303                    | Yes                      |
| <b>Beclin1</b>                    | Multiple t tests     | F x M                     | -                | 0.864294 | FDR                             | 0.603663                    | No                       |
| <b>Atg7</b>                       | Multiple t tests     | F x M                     | -                | 0.903441 | FDR                             | 0.603663                    | No                       |
| <b>Bax/Bcl-xL</b>                 | Multiple t tests     | F x M                     | -                | 0.763670 | FDR                             | 0.603663                    | No                       |
| <b>Klotho</b>                     | Multiple t tests     | F x M                     | -                | 0.016106 | FDR                             | 0.029595                    | Yes                      |

**Supplementary Table 1.** Summary of the statistical analyses and respective values. Analyses were conducted through two-tailed Student's *t*-test corrected by False Discovery Rate (FDR), or two-way ANOVA followed by Tukey's post hoc test. All adjusted P values (Tukey) or q values (FDR) and the respective significance or discovery statuses are included in the table.

## Inversed sex-based expression profiles of PTEN and Klotho in mice

Natalia Prudente de Mello<sup>1</sup>, Diana Zukas Andreotti<sup>1,2</sup>, Ana Maria Orellana<sup>2</sup>, Cristoforo Scavone<sup>2</sup>, Elisa Mitiko Kawamoto<sup>1</sup>

### Supplementary Information

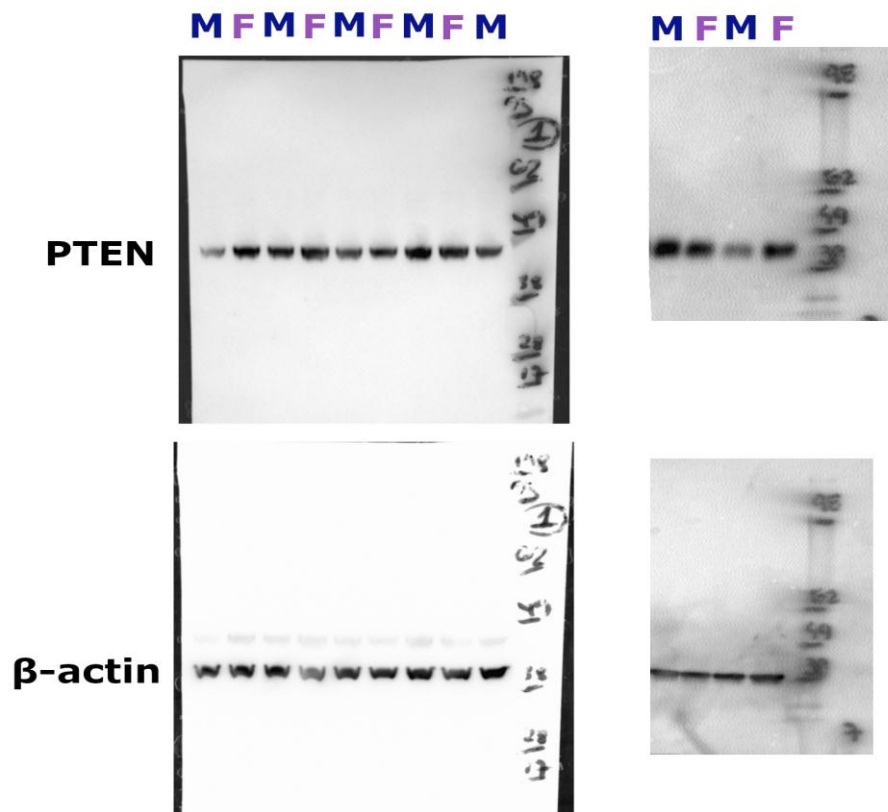

Supplementary Information - Figure 1

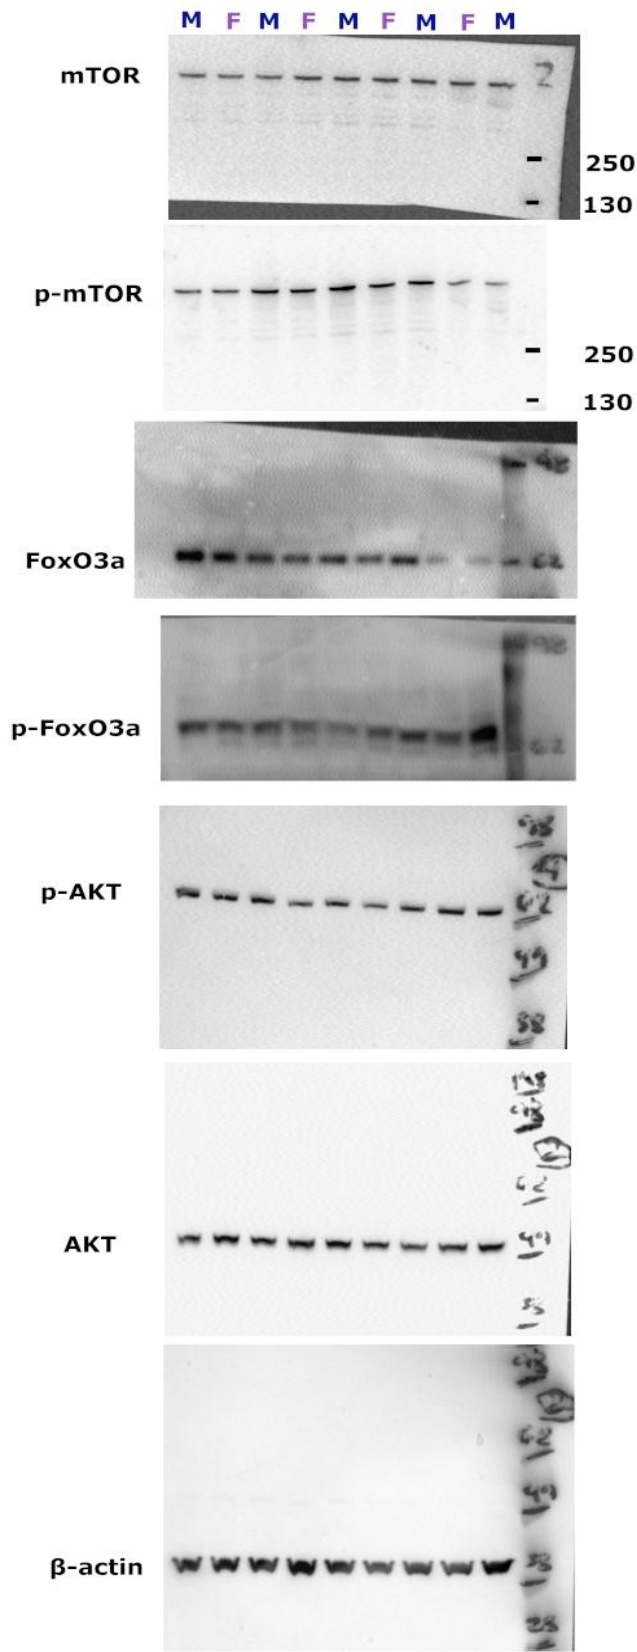

Supplementary Information - Figure 2

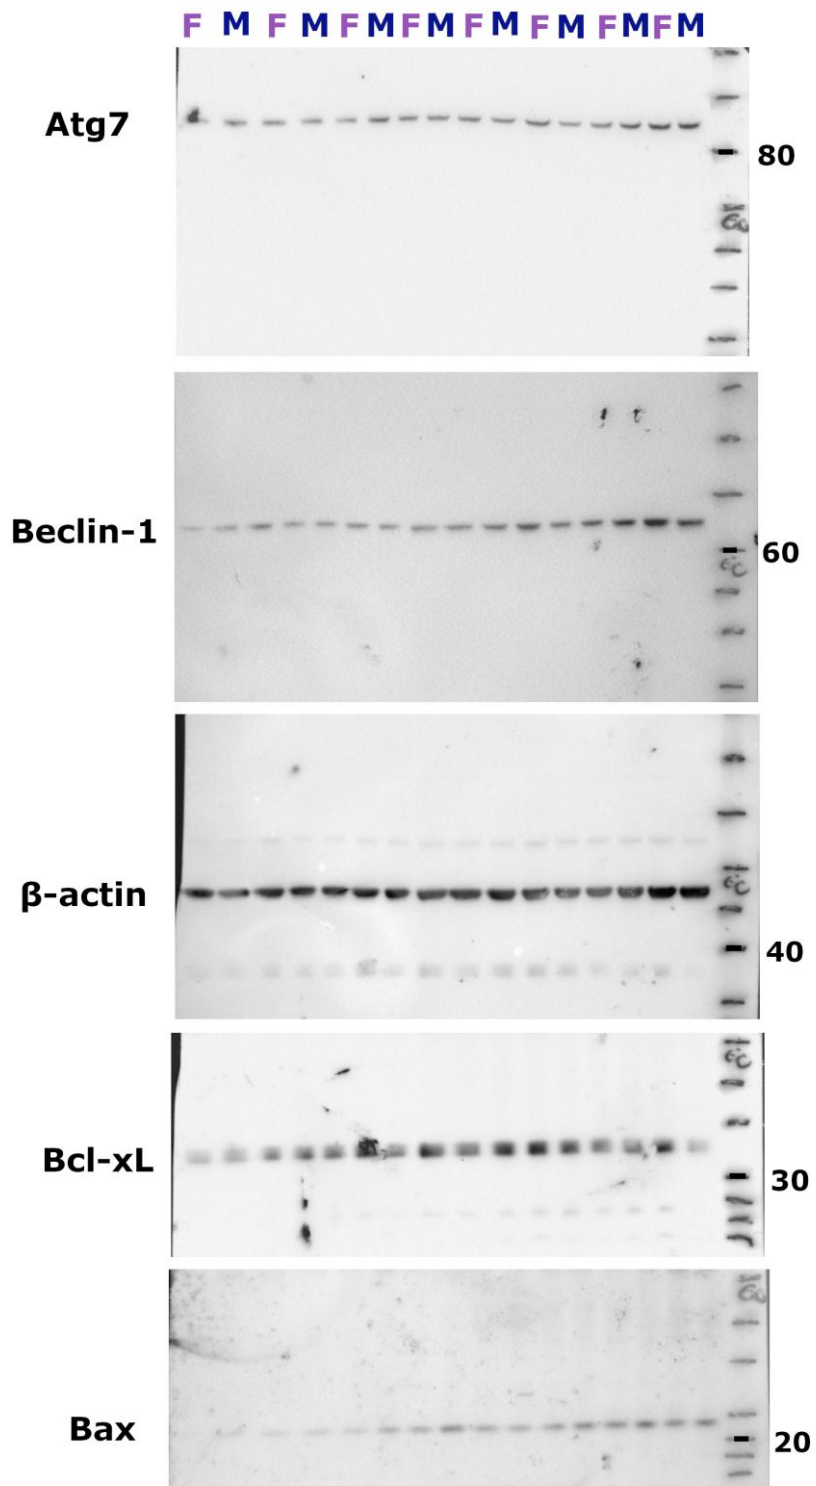

**Supplementary Information - Figure 3**
